# Supplementary material for: Diversity of Non-O157 Shiga Toxin-Producing Escherichia coli Isolated from Cattle from Central and Southern Chile
Source: MDPI journal article supplement (doi:10.3390/ani11082388), 2021-08-13
Supplement: s1 [file s1]

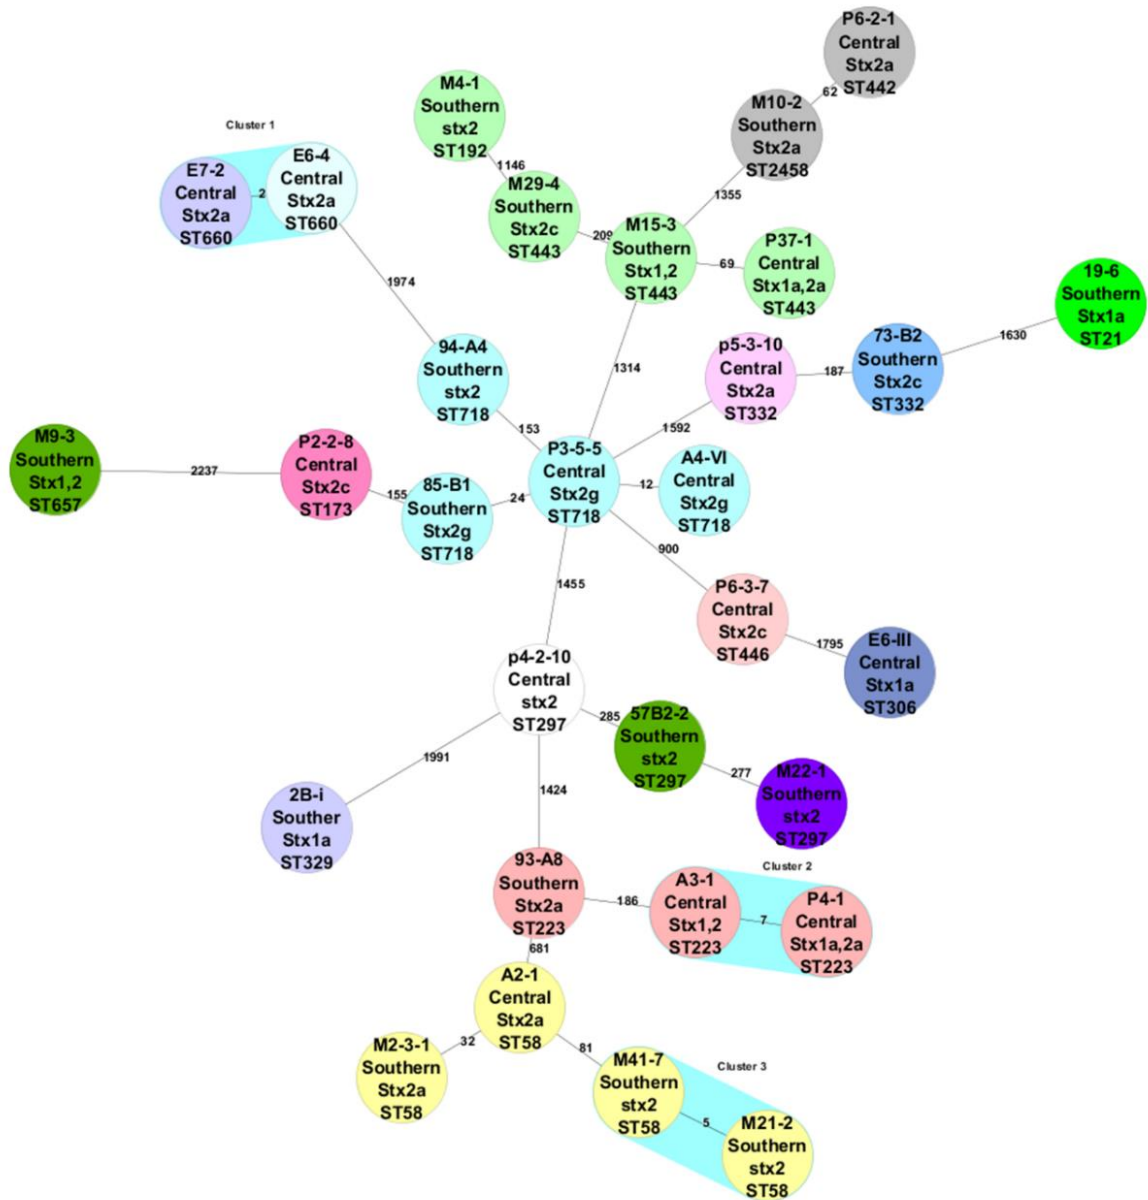

**Supplementary Figure S1.** Minimum Spanning Tree (MST) of STEC genomes isolated from cattle ( $n = 30$ ). Each circle represents an isolate. Each color indicates a serotype. Numbers on lines between circles indicate allele differences among the genomes. Each circle contains the isolate identification code, the origin of the isolates (central or southern Chile), *stx* type, the sequence type (ST). Three clusters are represented by a light blue area merging two or more circles and were defined as genomes with fewer than ten allele differences. A total of 2351 genes representing the STEC core genome was used to construct the MST.
