# Supplementary material for: Diversity of Non-O157 Shiga Toxin-Producing Escherichia coli Isolated from Cattle from Central and Southern Chile
Source: Animals (Basel). 2021 Aug 13;11(8):2388. doi: 10.3390/ani11082388 (PMC8388633; doi:10.3390/ani11082388)
Supplement: Supplementary file 1 [file animals-11-02388-s001.zip › SupplTablesDiazetal2021b.xlsx]

## Sheet: Table S1
Table S1: Percentage of STEC detected by farm in the study
Farm	Location	Type of farm	N	STEC +	%
A	Central	Dairy	11	7	63.6364
B	Central	Dairy	11	1	9.09091
C	Central	Dairy	11	4	36.3636
D	Central	Dairy	14	4	28.5714
E	Central	Dairy	15	3	20
F	Central	Dairy	12	4	33.3333
G	Central	Dairy	13	1	7.69231
H	Central	Dairy	12	2	16.6667
I	Central	Dairy	14	2	14.2857
J	Central	Dairy	13	2	15.3846
K	Central	Dairy	4	1	25
L	Central	Dairy	4	3	75
M	Central	Dairy	13	5	38.4615
N	Central	Dairy	8	0	0
	Tcental		155	39	25.1613
O	Southern	Dairy	41	6	14.6341
P	Southern	Dairy	50	4	8
Q	Southern	Dairy	50	1	2
R	Southern	Dairy	50	0	0
S	Southern	Dairy	50	2	4
	Tsouthern		241	13	5.39419
Slaughterhouse	Southern	Mixed	50	4	8
	TOTAL		446	56	12.5561

## Sheet: Table S2
Table S2: Preliminary genotypes and phenotypes of 91 non-O157 STEC isolates from Bovine.
Sample	Isolate	Location	stx 1	stx 2	sxt 1 + 2	hlyA	eae	Big Six	EHEC-Hly hemolisys	α-hemolysis (α-Hly)	Sorbitol fermentation	Tellurite resistance	β-glucuronidase	WGS available	saa variant
11	1	Central	0	1	0	0	0	0	0	1	1	1	1	0
11	7	Central	0	1	0	0	0	0	1	0	1	1	1	0
19	6	Central	1	0	0	1	0	1	1	0	1	1	1	0
34	7	Central	1	0	0	1	0	0	0	1	1	1	1	0
34	9	Central	0	1	0	0	0	0	0	1	1	1	1	0
2B	i	Southern	1	0	0	0	0	0	0	1	1	1	1	1	-
2B	b	Southern	0	1	0	0	0	0	0	1	1	0	1	0
2B	d	Southern	1	0	0	0	0	0	0	1	1	0	1	0
43B	8	Southern	1	0	0	0	0	0	0	0	1	0	1	0
49B	2	Southern	0	1	0	0	0	0	0	1	1	0	1	0
49B	6	Southern	0	1	0	0	0	0	1	0	1	0	1	0
49X	7 (48X-7)	Southern	1	0	0	0	0	0	0	0	1	0	1	0
57B	2	Southern	0	1	0	1	0	0	0	1	1	1	1	1	3
71A	6	Southern	0	1	0	0	0	0	0	1	1	0	1	0
71A	9	Southern	1	0	0	0	0	0	1	0	1	0	1	0
72A	2	Southern	1	0	0	0	0	0	0	1	1	0	1	0
72A	7	Southern	0	0	1	0	0	0	0	1	1	0	1	0
72A	8	Southern	0	1	0	0	0	0	0	1	1	1	1	0
73A	3	Southern	0	1	0	0	0	0	0	1	1	1	1	0
73A	5	Southern	0	0	1	0	0	0	0	1	1	1	1	0
73B	2	Southern	0	1	0	0	0	0	1	0	1	0	0	1	-
73B	2	Southern	0	1	0	0	0	0	1	0	1	0	1	0
78A	1	Southern	0	1	0	0	0	0	0	1	1	0	1	0
78A	2	Southern	0	0	1	0	0	0	0	1	1	0	1	0
85B	1	Southern	0	1	0	1	0	0	1	0	1	1	1	1	-
93A	8	Southern	0	1	0	1	0	0	0	1	1	1	1	1	3
94A	4	Southern	0	0	1	0	0	0	0	1	1	1	1	1	-
99A	10	Southern	0	1	0	0	0	0	1	0	1	1	1	0
A1	2	Central	0	1	0	0	0	0	0	1	1	0	1	0
A2	1	Central	0	1	0	1	0	0	0	1	1	0	1	1	2
A3	1	Central	0	0	1	1	0	0	1	0	1	0	1	1	3
A4	VI	Central	0	0	1	1	0	0	0	1	0	0	1	1	-
C1	I	Central	0	1	0	1	0	0	0	1	1	0	1	0
C4	III	Central	0	0	1	1	0	0	0	1	0	0	1	0
C4	VIII	Central	0	0	1	0	0	0	0	0	1	0	1	0
D7	1	Central	0	1	0	0	0	0	0	0	1	0	1	0
D8	4	Central	0	1	0	1	0	0	0	1	1	0	0	0
E6	VII	Central	0	1	0	1	0	0	0	0	0	0	1	0
E6	III	Central	0	0	1	1	0	0	0	1	1	1	1	1	-
E6	4	Central	0	1	0	1	0	0	1	0	0	0	1	1	-
E6	IV	Central	0	0	1	1	0	0	0	1	0	0	1	0
E7	2	Central	0	1	0	1	0	0	0	1	0	0	1	1	-
F5	4	Central	0	1	0	0	0	0	0	0	1	0	1	0
F6	II	Central	1	0	0	0	0	0	0	1	1	1	1	0
F6	V	Central	0	1	0	0	0	0	0	1	1	0	1	0
M10	2	Southern	0	1	0	1	0	0	0	1	1	1	1	1	1
M10	3	Southern	0	0	1	1	0	0	0	1	1	0	1	0
M14	9	Southern	0	1	0	0	0	0	0	0	0	1	1	0
M15	3	Southern	0	0	1	0	0	0	0	1	1	1	1	1	1
19	6	Southern	0	1	0	0	0	0	0	0	1	1	1	1	-
M2	3	Southern	0	1	0	1	0	0	0	0	1	0	1	1	2
M2	2	Southern	0	0	1	1	0	0	0	1	1	1	1	0
M21	1	Southern	0	1	0	1	0	0	0	1	1	1	1	0
M21	2	Southern	0	1	0	1	0	0	0	1	1	0	1	1	2
M22	1	Southern	0	1	0	1	0	0	0	1	1	1	1	1	4
M29	4	Southern	0	1	0	1	0	0	0	1	1	1	1	1	3
M29	2	Southern	0	1	0	0	0	0	0	0	1	0	1	0
M31	3	Southern	0	1	0	0	0	0	0	0	1	1	1	0
M31	8	Southern	0	1	0	0	0	0	1	0	1	1	1	0
M4	1	Southern	0	1	0	0	0	0	1	0	1	1	1	1	-
M40	4	Southern	0	0	1	0	0	0	0	0	1	1	1	0
M41	7	Southern	0	1	0	1	0	0	0	1	1	1	1	1	2
M43	6	Southern	0	1	0	0	0	0	0	1	1	1	1	0
M48	10	Southern	0	1	0	0	0	0	0	0	1	1	1	0
M50	7	Southern	0	0	1	0	0	0	0	1	1	1	1	0
M9	3	Southern	0	0	1	1	0	0	0	1	1	0	1	1	1
p2-2	8	Central	0	1	0	1	0	0	0	1	0	0	0	1	1
P34	1	Central	0	1	0	1	0	0	0	1	1	0	1	0
P34	4	Central	0	1	0	0	0	0	0	1	1	1	1	0
p3-5	3	Central	0	1	0	0	0	0	0	1	1	0	1	0
p3-5	5	Central	0	0	1	1	0	0	1	0	0	0	1	1	-
P4	4	Central	1	0	0	1	0	0	0	1	1	1	1	0
P4	1	Central	1	0	0	1	0	0	0	1	1	0	1	1	3
p4-2	10	Central	0	1	0	0	0	0	0	1	1	0	1	1	-
p5-3	7	Central	0	1	0	1	0	0	0	1	1	0	1	0
p5-3	10	Central	0	1	0	0	0	0	0	0	1	0	1	1	-
p6-1	4	Central	0	1	0	0	0	0	0	1	1	0	1	0
p6-2	2	Central	0	1	0	1	0	0	0	1	1	0	1	0
p6-2	1	Central	0	1	0	1	0	0	0	1	1	1	1	1	1
p6-3	3	Central	0	1	0	0	0	0	0	0	1	0	1	0
p6-3	7	Central	0	1	0	0	0	0	1	0	1	0	1	1	-
p6-4	7	Central	0	0	1	1	0	0	0	1	0	0	1	0
p7-1	8	Central	1	0	0	0	0	0	0	0	1	0	1	0
p7-2	1	Central	0	1	0	0	0	0	0	0	0	0	1	0
p7-2	3	Central	0	1	0	0	0	0	0	0	1	0	1	0
p7-2	9	Central	0	0	1	0	0	0	0	0	1	0	1	0
p7-2	10	Central	0	1	0	0	0	0	1	0	1	0	1	0
p7-3	1	Central	0	1	0	0	0	0	1	0	1	0	1	0
p7-3	3	Central	0	1	0	0	0	0	0	0	1	0	1	0
p7-4	8	Central	0	0	1	0	0	0	1	0	1	0	1	0
p7-4	10	Central	0	1	0	0	0	0	0	1	1	0	1	0
P37	1	Central	0	0	1	1	0	0	0	1	0	1	1	1	1
P37	5	Southern	0	0	1	1	1	0	0	1	0	1	1	0
	93	Total	12	59	22	37	1	1	17	56	80	37	90	30
		%	12.9032	63.4409	23.6559	39.7849	1.07527	1.07527	18.2796	60.2151	86.0215	39.7849	96.7742	32.2581
	48	Central	6	31	11	23	0	1	9	28	37	11	46	14
			12.5	64.5833	22.9167	47.9167	0	2.08333	18.75	58.3333	77.0833	22.9167	95.8333	29.1667
	45	Southern	6	28	11	14	1	0	8	28	43	26	44	16
			13.3333	62.2222	24.4444	31.1111	2.22222	0	17.7778	62.2222	95.5556	57.7778	97.7778	35.5556
Cells with the number 1 means presence and 0 absence
Genes were detected by PCR previusly described by Toro et al., 2013; Chen et al., 1998; Xia et al., 2010; Lucchesi et al., 2006.
			stx 1	stx 2	sxt 1 + 2	hlyA	eae	Big Six			EHEC-Hly hemolisys	α-hemolysis (α-Hly)	Sorbitol fermentation	Tellurite resistance	β-glucuronidase
			12.9032	63.4409	23.6559	39.7849	1.07527	1.07527			60.2151	86.0215	39.7849	96.7742	32.2581

## Sheet: Table S3
Table S3. Allele Matrix generated by a cgMLST analysis from 30 STEC genomes.
#Missing values in Distance Columns	Perc. Good Targets	Sample ID	Area of isolation	Stx subtype	ST	Serotype	b0001	b0002	b0008	b0010	b0011	b0013	b0015	b0018	b0019	b0023	b0024	b0025	b0026	b0027	b0028	b0029	b0030	b0032	b0034	b0035	b0036	b0037	b0038	b0040	b0043	b0047	b0048	b0049	b0050	b0051	b0052	b0053	b0055	b0058	b0059	b0060	b0061	b0062	b0064	b0069	b0071	b0073	b0074
0	86.7	E6-4	Central	Stx2a	ST660	O172:H25	2	6	7	2	5	5	5	1	5	2	3	4	6	4	6	4	7	8	1	3	1	7	6	1	8	8	2	7	2	4	2	7	5	6	7	8	1	6	6	9	1	4	6
0	90.4	94-A4	Southern	stx2	ST718	O168:H8	2	4	6	3	4	1	4	1	3	1	3	3	5	1	3	1	5	5	1	1	1	5	5	1	5	5	4	5	1	1	4	4	5	5	5	5	3	3	4	7	1	3	3
0	88.7	A3-1	Central	Stx1,2	ST223	O113:H21	2	3	3	2	3	5	3	1	3	1	3	3	3	1	4	6	3	7	1	1	4	4	5	4	6	6	5	6	1	1	3	5	5	3	3	6	3	4	5	6	1	3	3
0	81.1	73-B2	Southern	Stx2c	ST332	O174:H2	2	3	4	2	3	4	1	1	4	1	3	3	4	3	2	4	4	4	1	1	3	4	4	3	4	4	3	4	1	1	3	1	1	4	4	4	1	1	3	4	1	3	4
0	86.8	A2-1	Central	Stx2a	ST58	O116:H21	2	5	3	2	3	6	3	1	3	1	3	3	3	1	5	5	6	6	1	1	5	6	5	4	7	7	5	6	1	2	4	6	6	2	6	7	3	5	3	8	1	3	3
0	83.0	M41-7	Southern	stx2	ST58	O116:H21	2	5	3	2	3	6	3	1	3	1	3	3	3	1	5	5	6	6	1	1	5	6	5	4	4	7	5	6	1	2	4	6	6	2	6	7	3	5	3	8	1	3	3
0	90.1	57B2-2	Southern	stx2	ST297	O130:H11	3	3	3	2	3	3	3	1	3	1	3	3	3	1	2	3	3	3	1	1	1	3	3	1	3	3	2	3	1	3	3	3	3	3	3	3	3	3	3	3	1	3	3
0	89.8	M21-2	Southern	stx2	ST58	O116:H21	2	5	3	2	3	6	3	1	3	1	3	3	3	1	5	5	6	6	1	1	5	6	5	4	4	7	5	6	1	2	4	6	6	2	6	7	3	5	3	8	1	3	3
0	85.2	85-B1	Southern	Stx2g	ST718	O168:H8	2	4	5	3	4	1	4	1	3	1	3	3	5	1	3	1	5	5	1	1	1	5	5	1	5	5	4	5	1	1	4	4	4	5	5	5	3	3	4	5	1	3	3
0	90.0	M4-1	Southern	stx2	ST192	O153/178:H19	2	3	9	2	4	1	8	1	1	1	3	3	3	1	2	3	3	3	5	1	1	9	9	6	11	3	5	9	1	1	5	1	3	3	3	12	3	1	7	6	1	6	3
0	89.7	19-6	Southern	Stx1a	ST21	O26:H11	1	1	1	1	1	1	1	1	1	1	1	1	1	1	1	1	1	1	1	1	1	1	1	1	1	1	1	1	1	1	1	1	1	1	1	1	1	1	1	1	1	1	1
0	86.1	p5-3-10	Central	Stx2a	ST332	O171:H2	2	3	4	2	3	4	12	1	4	1	3	3	4	3	2	4	4	4	1	1	3	4	4	3	4	4	3	4	1	1	3	1	1	4	4	4	1	1	3	18	1	3	1
0	90.3	p4-2-10	Central	stx2	ST297	O?:H8	2	3	3	2	3	5	11	1	3	1	3	3	3	1	2	3	3	3	1	1	1	10	3	1	3	3	2	11	1	3	3	3	3	3	3	15	3	3	3	17	1	3	3
0	83.7	M29-4	Southern	Stx2c	ST443	O153/178:H19	2	8	11	2	4	1	1	1	1	1	3	3	3	1	2	3	3	3	5	1	1	9	10	6	11	12	8	8	1	5	3	1	5	8	10	3	3	3	3	13	1	3	3
0	90.6	P6-3-7	Central	Stx2c	ST446	O22:H8	2	10	5	3	4	1	1	1	1	1	3	8	3	7	2	4	11	4	1	1	1	12	14	9	4	12	7	8	1	5	3	11	5	5	5	5	3	3	4	16	1	3	3
0	89.6	M22-1	Southern	stx2	ST297	O?:H46	2	3	10	2	3	5	3	1	3	1	3	6	3	1	2	3	3	3	1	1	1	10	3	1	3	3	2	3	1	3	3	3	3	3	3	11	3	3	3	3	1	3	3
0	84.3	E7-2	Central	Stx2a	ST660	O172:H28	2	6	7	2	5	5	5	1	5	2	3	4	6	4	6	4	7	8	1	3	1	7	6	1	8	8	2	7	2	4	2	7	5	6	7	8	1	6	6	9	1	4	6
0	90.3	P6-2-1	Central	Stx2a	ST442	O91:H21	2	7	8	5	1	1	7	1	1	1	3	3	8	1	7	7	9	10	3	4	1	4	13	4	10	10	7	6	1	2	4	8	6	2	9	10	3	3	8	11	1	3	3
0	89.5	A4-VI	Central	Stx2g	ST718	O168:H8	2	4	5	3	4	1	4	1	3	1	3	3	5	1	3	1	5	5	1	1	1	5	5	1	5	5	4	5	1	1	4	4	4	5	5	5	3	3	4	5	1	3	3
0	84.2	P4-1	Central	Stx1a,2a	ST223	O113:H21	2	3	3	2	3	5	3	1	3	1	3	3	3	1	4	6	3	7	1	1	4	4	5	4	6	6	5	6	1	1	3	5	5	3	3	6	3	4	5	6	1	3	3
0	89.4	93-A8	Southern	Stx2a	ST223	O113:H21	2	3	3	2	3	5	3	1	3	1	3	3	3	1	4	5	3	6	1	1	4	4	5	4	6	6	5	6	1	1	3	5	5	3	3	6	3	4	5	6	1	3	5
0	89.7	E6-III	Central	Stx1a	ST306	O98:H21	2	7	1	4	6	5	6	1	6	1	3	5	7	5	2	4	8	9	1	1	1	8	7	5	9	9	6	8	1	1	3	1	7	7	8	9	4	7	7	10	1	5	7
0	86.4	M2-3-1	Southern	Stx2a	ST58	O116:H21	2	5	3	2	3	6	3	1	3	1	3	3	3	1	5	5	6	6	1	1	5	6	5	4	4	7	5	6	1	2	4	6	6	2	6	7	3	5	3	8	1	3	3
0	90.2	M15-3	Southern	Stx1,2	ST443	O153/178:H19	2	8	9	2	4	1	1	1	1	1	3	3	3	1	2	3	3	3	4	1	1	9	9	6	11	11	7	8	1	5	3	1	5	8	10	3	3	3	3	12	1	3	3
0	90.1	M10-2	Southern	Stx2a	ST2458	O91:H21	2	7	8	5	1	1	7	1	1	1	3	3	8	1	7	7	9	10	3	4	1	4	8	4	10	10	7	6	1	2	4	8	6	2	9	10	3	3	8	11	1	3	3
0	90.5	P3-5-5	Central	Stx2g	ST718	O168:H8	2	4	5	3	4	1	4	1	3	1	3	3	5	1	3	1	5	5	1	1	1	5	5	1	5	5	4	5	1	1	4	4	4	5	5	5	3	3	4	5	1	3	3
0	88.6	P2-2-8	Central	Stx2c	ST173	O181:H49	2	3	4	7	4	5	10	3	8	1	3	3	5	1	3	1	5	12	1	1	1	9	12	8	13	14	10	8	1	1	7	10	1	10	12	14	6	9	3	15	1	3	3
0	90.3	P37-1	Central	Stx1a,2a	ST443	O153/178:H19	2	8	9	2	4	1	1	1	1	1	3	3	3	1	2	3	3	3	4	1	1	9	9	6	11	15	7	8	1	5	3	1	5	8	10	3	3	3	3	6	1	3	3
0	84.4	2B-i	Souther	Stx1a	ST329	O3:H12	2	2	2	2	2	2	2	1	2	1	2	2	2	2	2	2	2	2	2	2	2	2	2	2	2	2	2	2	1	2	2	2	2	2	2	2	2	2	2	2	2	2	2
0	85.8	M9-3	Southern	Stx1,2	ST657	O183:H18	2	9	12	6	7	7	9	2	7	3	4	7	9	6	8	8	10	11	6	5	6	11	11	7	12	13	9	10	3	6	6	9	8	9	11	13	5	8	9	14	3	7	8
Target genes were defined using E. coli strain K-12 MG1655 (GenBank Accession: NC_000913.3) as a template with the Target Definer Tool in Ridom Seqsphere+. Then, assembled genomes of 30 STEC in this study were compared with the template to define the core genome of STEC (Suppl. Table 1).
[truncated: 2,307 more columns]

## Sheet: Table S4
Table S4. SNP distance Matrix of STEC genomes
isolate (genome)	19-6	2B-i	57B2-2	73-B2	85-B1	93-A8	94-A4	A2-1	A3-1	A4-VI	E6-4	E6-III	E7-2	M10-2	M15-3	M21-2	M22-1	M2-3-1	M29-4	M41-7	M4-1	M9-3	P2-2-8	P3-5-5	P37-1	P4-1	p4-2-10	p5-3-10	P6-2-1	P6-3-7
19-6	0	23677	14593	14762	14616	14914	14618	15128	14923	14584	20444	17053	20470	14790	14504	15099	14912	15144	14512	15126	14445	44054	15186	14594	14510	14955	14960	14712	14783	14323
2B-i	23677	0	23626	23499	23230	23674	23291	23987	23642	23239	24802	24180	24798	23603	23504	23978	23737	23997	23495	23944	23532	42689	23854	23254	23544	23661	23625	23506	23570	23382
57B2-2	14593	23626	0	14503	12543	12096	12548	12530	12101	12518	20466	17606	20474	12790	13016	12517	1589	12542	13015	12600	12555	43727	14314	12521	13021	12155	1589	14452	12789	12641
73-B2	14762	23499	14503	0	13686	14121	13721	14747	14119	13643	20444	17433	20450	14173	14206	14724	14619	14755	14218	14791	14092	43942	14646	13648	14230	14155	14401	656	14164	13627
85-B1	14616	23230	12543	13686	0	12687	431	13242	12677	141	20376	17467	20380	11796	10606	13222	12580	13254	10609	13287	11526	43685	13680	138	10615	12721	12434	13647	11788	7011
93-A8	14914	23674	12096	14121	12687	0	12659	4496	361	12642	20331	17439	20345	12363	12445	4498	12236	4512	12449	4604	12692	43954	13467	12645	12462	433	12041	14082	12362	12059
94-A4	14618	23291	12548	13721	431	12659	0	13214	12650	360	20388	17469	20408	11758	10578	13194	12587	13232	10588	13261	11528	43714	13671	355	10589	12698	12451	13668	11750	6986
A2-1	15128	23987	12530	14747	13242	4496	13214	0	4501	13205	20484	17933	20500	12959	13109	220	12750	126	13115	360	13217	44050	13921	13208	13128	4559	12461	14704	12956	12983
A3-1	14923	23642	12101	14119	12677	361	12650	4501	0	12634	20314	17429	20328	12367	12442	4499	12237	4517	12451	4605	12698	43940	13468	12635	12459	106	12044	14080	12364	12053
A4-VI	14584	23239	12518	13643	141	12642	360	13205	12634	0	20366	17443	20372	11747	10563	13187	12555	13221	10574	13254	11477	43689	13647	41	10574	12682	12409	13590	11743	6948
E6-4	20444	24802	20466	20444	20376	20331	20388	20484	20314	20366	0	20035	68	20655	20647	20467	20790	20502	20637	20518	20661	45101	20942	20372	20676	20344	20636	20437	20634	20315
E6-III	17053	24180	17606	17433	17467	17439	17469	17933	17429	17443	20035	0	20043	17830	17539	17912	17725	17956	17557	17987	17381	44283	18023	17445	17556	17463	17653	17405	17813	17335
E7-2	20470	24798	20474	20450	20380	20345	20408	20500	20328	20372	68	20043	0	20675	20659	20483	20800	20518	20647	20532	20683	45111	20940	20378	20688	20358	20648	20449	20654	20341
M10-2	14790	23603	12790	14173	11796	12363	11758	12959	12367	11747	20655	17830	20675	0	10634	12965	12735	12981	10637	13035	10714	43684	13860	11752	10639	12409	12662	14118	145	11909
M15-3	14504	23504	13016	14206	10606	12445	10578	13109	12442	10563	20647	17539	20659	10634	0	13107	13092	13125	526	13175	8802	43738	13899	10562	195	12490	12922	14144	10627	11456
M21-2	15099	23978	12517	14724	13222	4498	13194	220	4499	13187	20467	17912	20483	12965	13107	0	12735	232	13113	190	13202	44038	13908	13188	13120	4563	12448	14679	12962	12965
M22-1	14912	23737	1589	14619	12580	12236	12587	12750	12237	12555	20790	17725	20800	12735	13092	12735	0	12762	13087	12818	12613	43673	14405	12558	13093	12291	1668	14574	12736	12683
M2-3-1	15144	23997	12542	14755	13254	4512	13232	126	4517	13221	20502	17956	20518	12981	13125	232	12762	0	13131	370	13231	44054	13939	13224	13144	4569	12471	14716	12978	12997
M29-4	14512	23495	13015	14218	10609	12449	10588	13115	12451	10574	20637	17557	20647	10637	526	13113	13087	13131	0	13171	8799	43726	13876	10573	525	12491	12919	14156	10630	11455
M41-7	15126	23944	12600	14791	13287	4604	13261	360	4605	13254	20518	17987	20532	13035	13175	190	12818	370	13171	0	13282	44006	13996	13255	13188	4663	12531	14665	13032	13047
M4-1	14445	23532	12555	14092	11526	12692	11528	13217	12698	11477	20661	17381	20683	10714	8802	13202	12613	13231	8799	13282	0	43820	13895	11484	8807	12748	12420	14025	10711	11969
M9-3	44054	42689	43727	43942	43685	43954	43714	44050	43940	43689	45101	44283	45111	43684	43738	44038	43673	44054	43726	44006	43820	0	43823	43692	43783	43928	43718	43905	43664	43759
P2-2-8	15186	23854	14314	14646	13680	13467	13671	13921	13468	13647	20942	18023	20940	13860	13899	13908	14405	13939	13876	13996	13895	43823	0	13654	13899	13488	14195	14554	13855	13765
P3-5-5	14594	23254	12521	13648	138	12645	355	13208	12635	41	20372	17445	20378	11752	10562	13188	12558	13224	10573	13255	11484	43692	13654	0	10571	12683	12414	13599	11746	6951
P37-1	14510	23544	13021	14230	10615	12462	10589	13128	12459	10574	20676	17556	20688	10639	195	13120	13093	13144	525	13188	8807	43783	13899	10571	0	12507	12929	14164	10632	11467
P4-1	14955	23661	12155	14155	12721	433	12698	4559	106	12682	20344	17463	20358	12409	12490	4563	12291	4569	12491	4663	12748	43928	13488	12683	12507	0	12098	14108	12408	12083
p4-2-10	14960	23625	1589	14401	12434	12041	12451	12461	12044	12409	20636	17653	20648	12662	12922	12448	1668	12471	12919	12531	12420	43718	14195	12414	12929	12098	0	14356	12663	12538
p5-3-10	14712	23506	14452	656	13647	14082	13668	14704	14080	13590	20437	17405	20449	14118	14144	14679	14574	14716	14156	14665	14025	43905	14554	13599	14164	14108	14356	0	14109	13597
P6-2-1	14783	23570	12789	14164	11788	12362	11750	12956	12364	11743	20634	17813	20654	145	10627	12962	12736	12978	10630	13032	10711	43664	13855	11746	10632	12408	12663	14109	0	11895
P6-3-7	14323	23382	12641	13627	7011	12059	6986	12983	12053	6948	20315	17335	20341	11909	11456	12965	12683	12997	11455	13047	11969	43759	13765	6951	11467	12083	12538	13597	11895	0
SNP matrix generated with CSI Phylogeny 1.4 with default parameters.
E. coli K-12 MG1655 (GenBank Accession: NC_000913.3) was used as a reference genome.
